# Supplementary material
Source: PubMed Central journal article supplement (PMC4959185)
Supplement: AEM.00599-16_zam999117263so1.pdf [file AEM.00599-16_zam999117263so1.pdf]

## Supplementary Material for:

### Implications of limited thermophilicity of reduction of nitrite for control of sulfide production in oil reservoirs

By:

Tekle Tafese Fida, Chuan Chen, Gloria Okpala, and Gerrit Voordouw

Table S1. Physico-chemical data for samples of injection water (14IW), produced water (18PW) or source water (also referred to as makeup water) 22SW, collected from the MHGC field. Data are averages for 6 samples.

| Sample ID | pH   | NaCl<br>(M) | Sulfide<br>(mM) | Sulfate<br>(mM) | Nitrate<br>(mM) | NH <sub>4</sub> <sup>+</sup><br>(mM) | Acetate<br>(mM) |
|-----------|------|-------------|-----------------|-----------------|-----------------|--------------------------------------|-----------------|
| MHGC_14IW | 7.75 | 0.11        | 0.03            | 0.06            | 0.38            | 0.41                                 | ND              |
| MHGC_18PW | 7.84 | 0.12        | 0.05            | 0.0             | 0.0             | 0.47                                 | ND              |
| MHGC_22SW | 7.19 | 0           | 0.0             | 3.4             | 0.92            | 0.36                                 | ND              |

Table S2. Comparison of the *nirK* or *nirS* sequence of pure isolates with nitrite reductase sequence from NCBI database. The sequences were obtained from the PCR product after amplification of *nirK* with GnrK2F primer and *nirS* with NirS2F primer.

| Strain                                  | Genbank<br>Accession<br># | Nucleotide<br>blasted<br>(bases) | Identity      | E-<br>value        | Sequence identification                                      |
|-----------------------------------------|---------------------------|----------------------------------|---------------|--------------------|--------------------------------------------------------------|
| <i>G. stearothermophilus</i><br>DSM22   | KX139464                  | 375                              | 366/366(100%) | 0                  | <i>G. stearothermophilus</i><br>partial <i>nirK</i>          |
| <i>G. thermodenitrificans</i><br>DSM465 | KX139465                  | 375                              | 366/366(100%) | 0                  | <i>G. thermodenitrificans</i><br>partial <i>nirK</i>         |
| <i>G. toebii</i> DSM14590               | KX139466                  | 375                              | 366/366(100%) | 0                  | <i>G. toebii</i> partial <i>nirK</i>                         |
| <i>G. thermocatenuatus</i><br>DSM730    | KX139467                  | 375                              | 343/366(94%)  | 1e <sup>-154</sup> | <i>G. thermodenitrificans</i><br>partial <i>nirK</i>         |
| <i>G. subterraneus</i><br>DSM13552      | KX139468                  | 375                              | 363/366(99%)  | 0                  | <i>G. thermodenitrificans</i><br>partial <i>nirK</i>         |
| <i>Thauera</i> sp. TK001                | Not issued*               | 96                               | 22/24(92%)    | 4e <sup>-6</sup>   | <i>Thauera phenylacetica</i><br><i>nirS</i> partial sequence |

\*Sequence was too short to be issued an accession number:

AAGGAAACCGGCATGGTGTATGTGCGGTGGATTATCGCGACCTCGACAACCTCAAGCTCAAGATGATCGAGGCGGCACCCCTTCCTGCACGA  
CGGCGG

Results are for tblastx search of translated protein sequence of 24 aa.

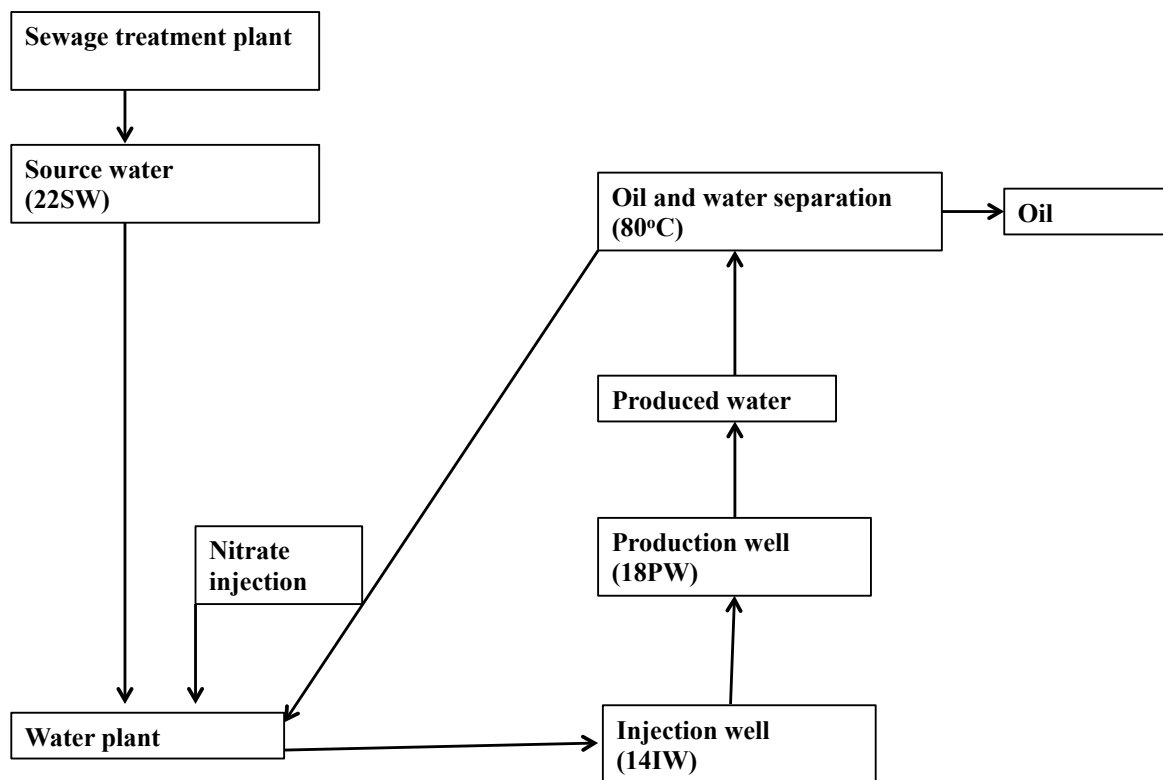

FIG. S1. Schematic of the MHGC field indicating source water, as well as injection and production wells, as explained in more detail elsewhere (Voordouw et al. 2009, *Environ. Sci. Technol.* 43 (24), pp 9512–9518, DOI: 10.1021/es902211j). Note that in the water plant source water (also referred to as makeup water) and produced water are combined to injection water, which is distributed to multiple injection wells throughout the field. Source water (makeup water) is needed to replace the volume of oil produced, i.e. without its the pressure differential in the field, which moves oil and water, would fall. Sampling sites for source water (22SW), injection water (14IW) and produced water (18PW) are indicated. Temperatures of these samples were between 10°C and 30°C at the time of collection.

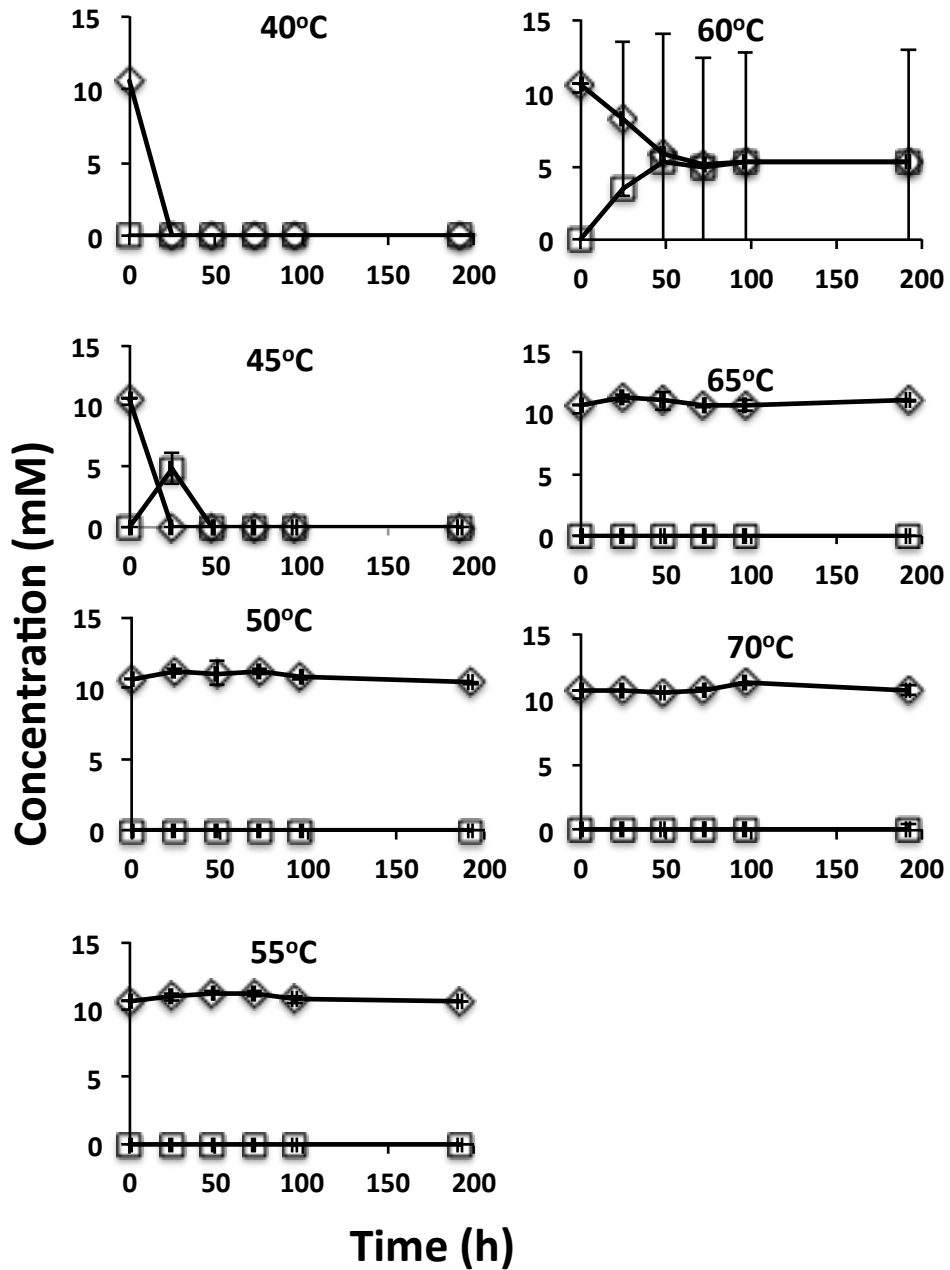

FIG. S2. Reduction of nitrate ( $\diamond$ ) to nitrite ( $\square$ ) with VFA as electron donor by concentrated 14IW consortia at different temperatures. Data shown are averages of duplicate incubations. No reduction of nitrate was seen at 40 or 70°C in the absence of inoculation.

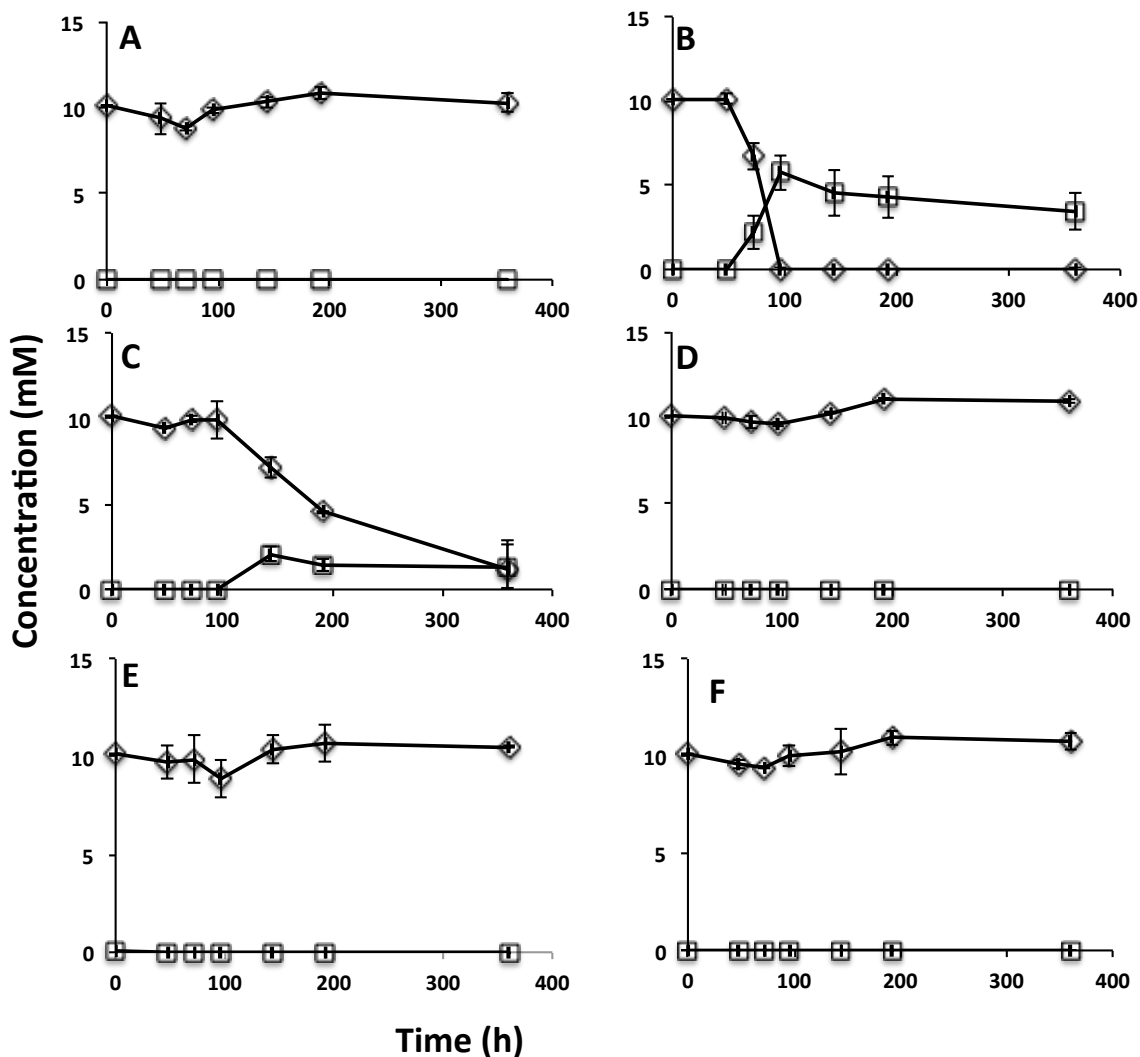

FIG. S3. Reduction of nitrate ( $\diamond$ ) and formation of nitrite ( $\square$ ) by 18PW samples incubated at 40°C using BTEX compounds, dissolved in HMN, as electron donor and nitrate as the electron acceptor. The BTEX compounds were benzene (A), toluene (B), ethylbenzene (C), *m*-xylene (D), *o*-xylene (E) and *p*-xylene (F). In (B) reduction of 10 mM nitrate to 5 mM nitrite and 2.5 mM  $N_2$  required  $10 + 25 = 35$  mM of electrons, which required oxidation of 0.97 mM toluene to  $CO_2$ . Since 28 mM toluene in 0.5 ml HMN was provided in a total volume (HMN plus aqueous phase) of 19.5 ml, the overall concentration of toluene was  $28 \times 0.5 / 19.5 = 0.72$  mM. Hence, the partial reduction of nitrate is consistent with a limiting concentration of electron donor. In (C) reduction of 9 mM nitrate to 1 mM nitrite and 4 mM  $N_2$  required  $2 + 40 = 42$  mM of electrons, which required oxidation of 1 mM ethylbenzene to  $CO_2$ . Since the overall concentration of ethylbenzene was  $24 \times 0.5 / 19.5 = 0.62$  mM, the partial reduction of nitrate is consistent with a limiting concentration of electron donor. Note that instead of  $N_2$ , either NO or  $N_2O$  could also be products.

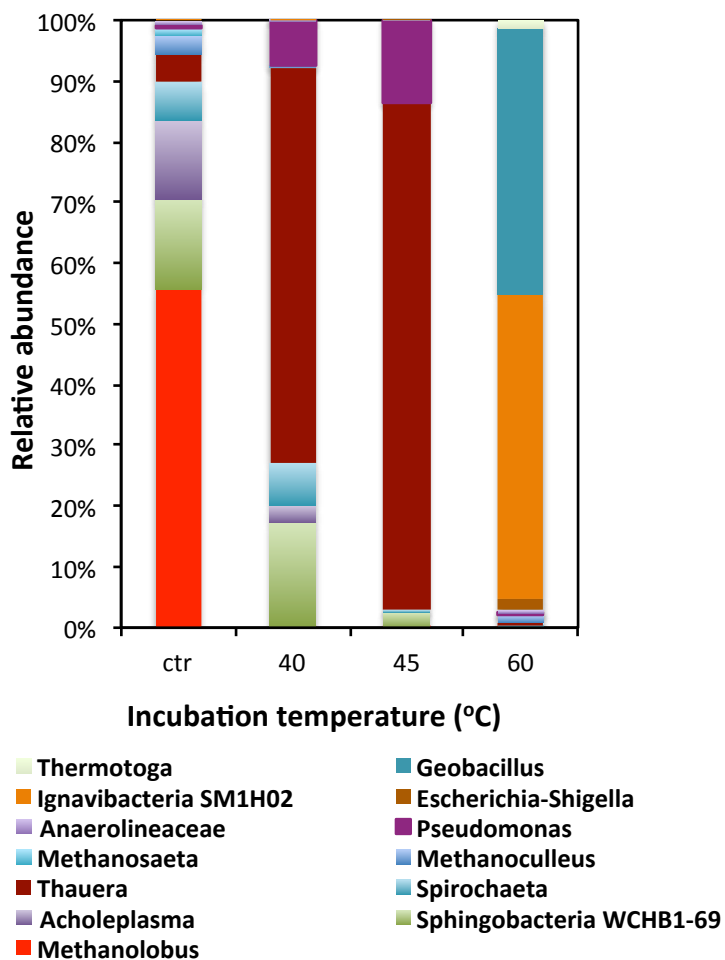

FIG. S4. Microbial community composition of 14IW incubated in CSBK medium with nitrate and VFA at different temperatures at the genus level. The community composition of 14IW prior to incubation is also shown (Ctr).

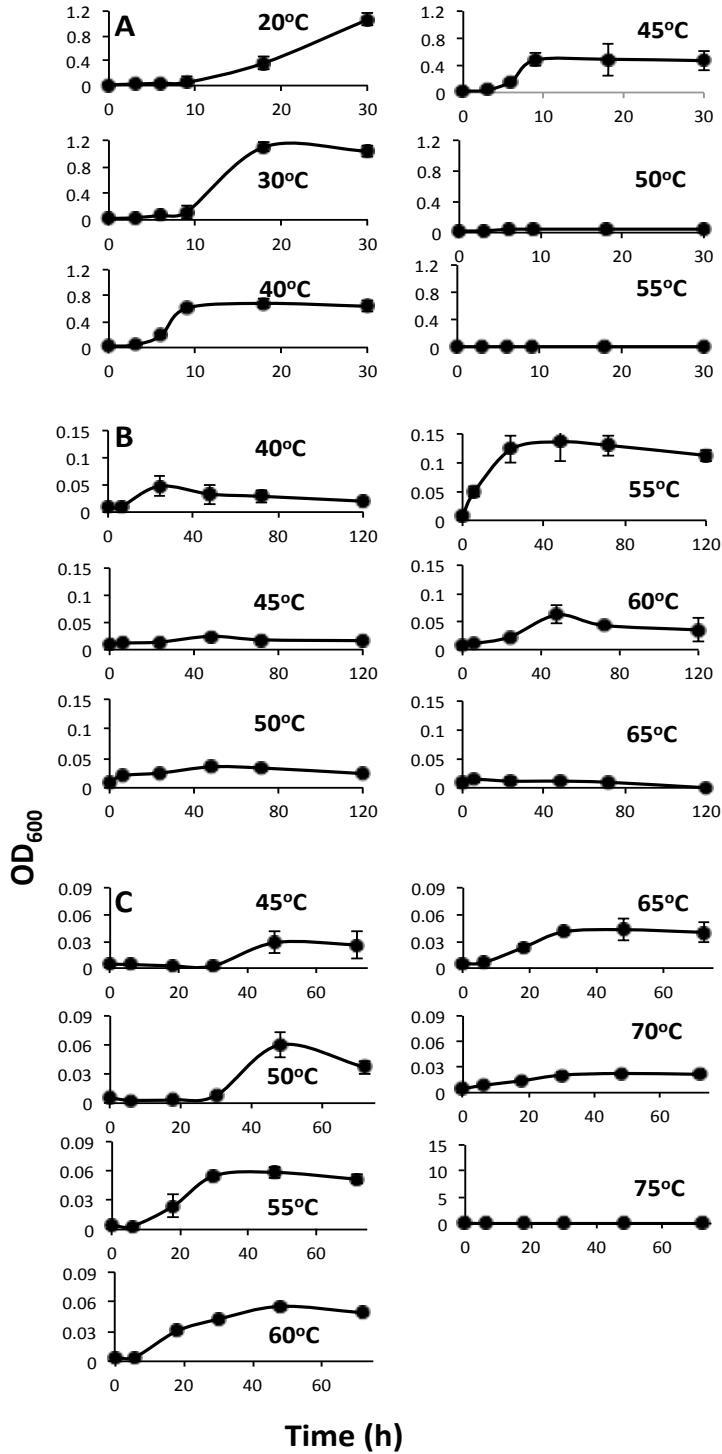

FIG. S5. Temperature dependence of growth ( $OD_{600}$ ) of (A) *Thauera* sp. TK001, (B) *Petrobacter* sp. TK002 and (C) *Geobacillus* sp. TK003 in CSBK medium with 10 mM nitrate and 3 mM VFA. Data are averages of duplicate incubations. Data for reduction of nitrate to nitrite of these cultures are presented in Fig. 3.

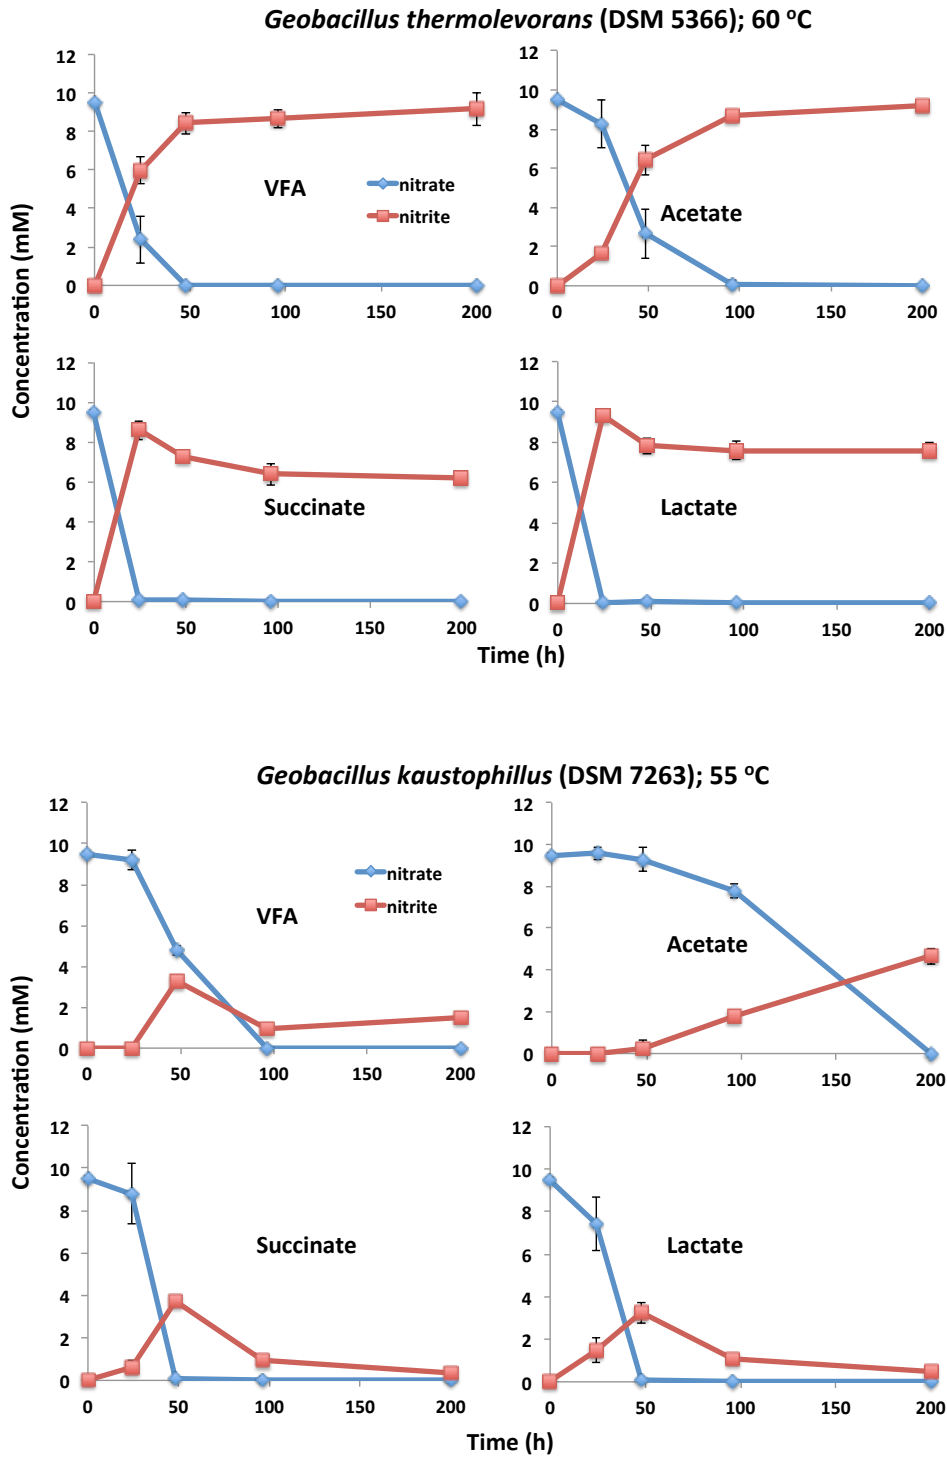

FIG. S6.

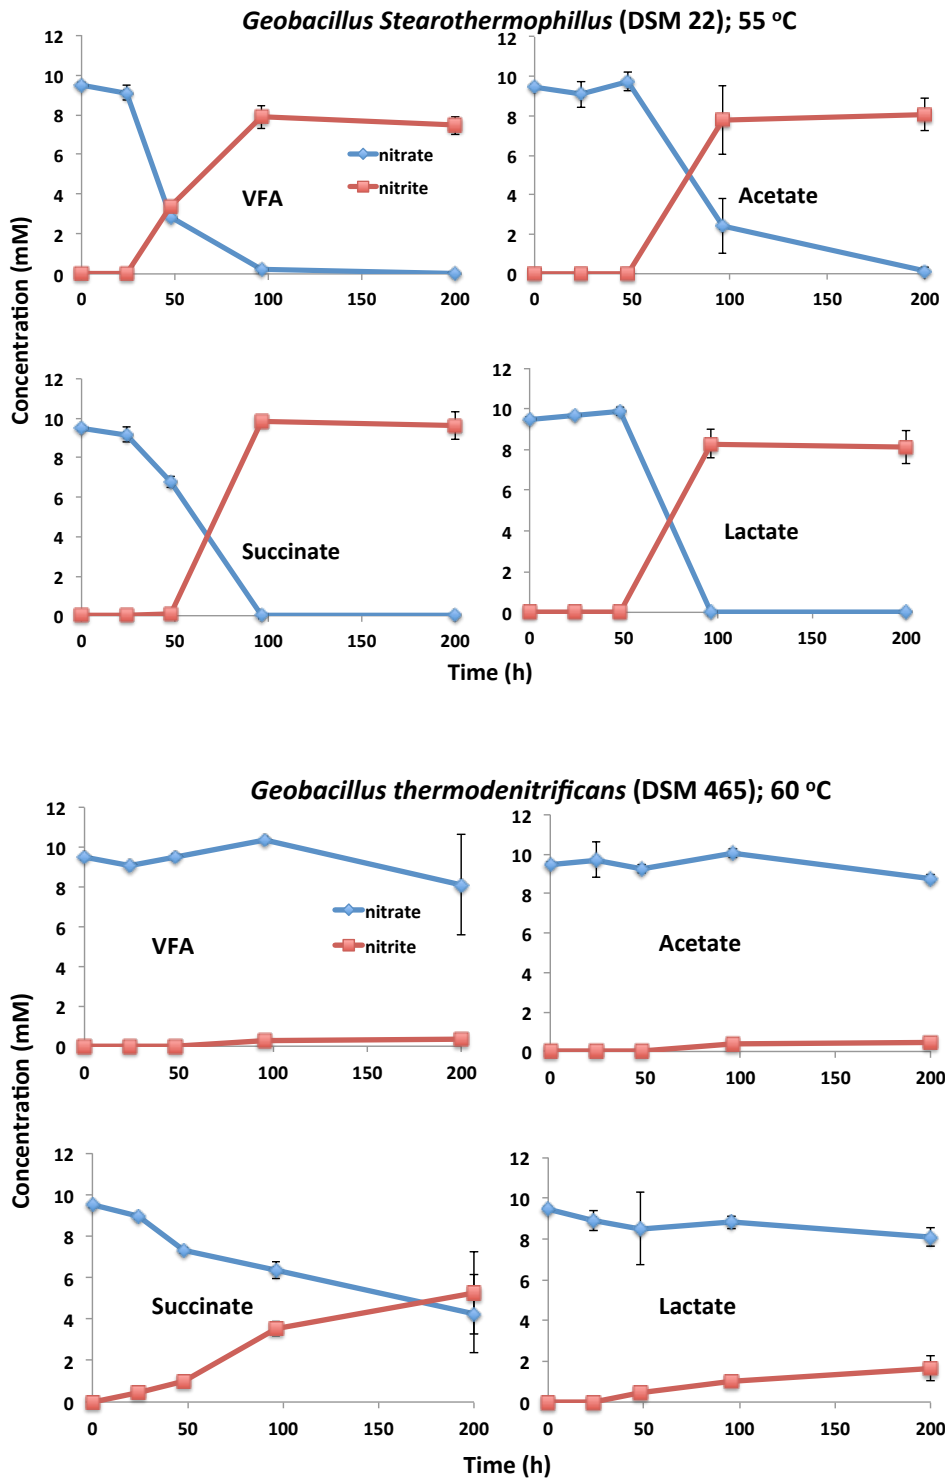

FIG. S6. (continued)



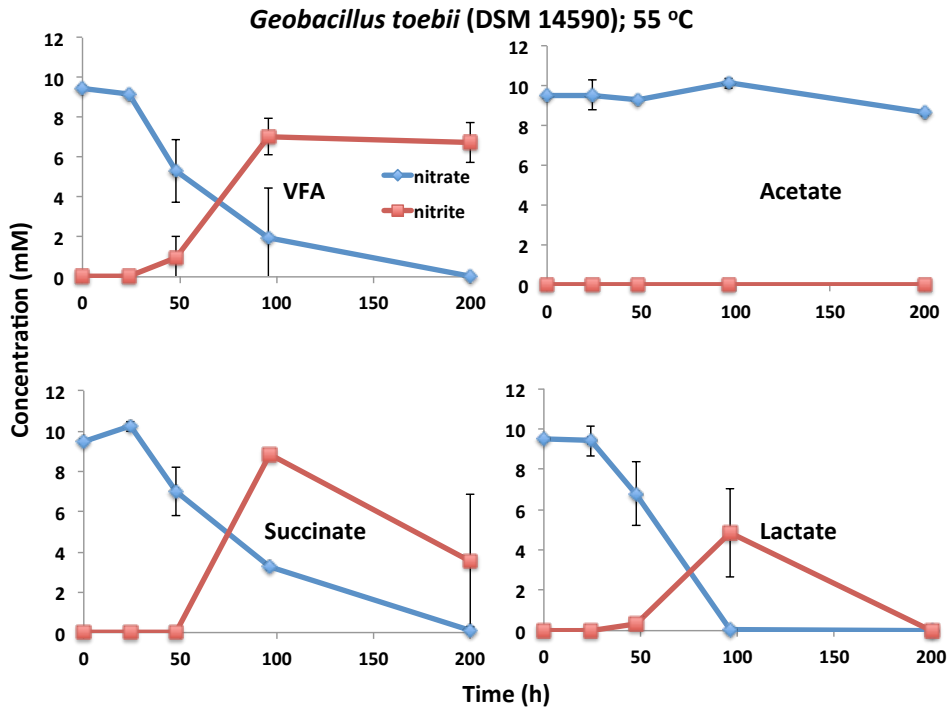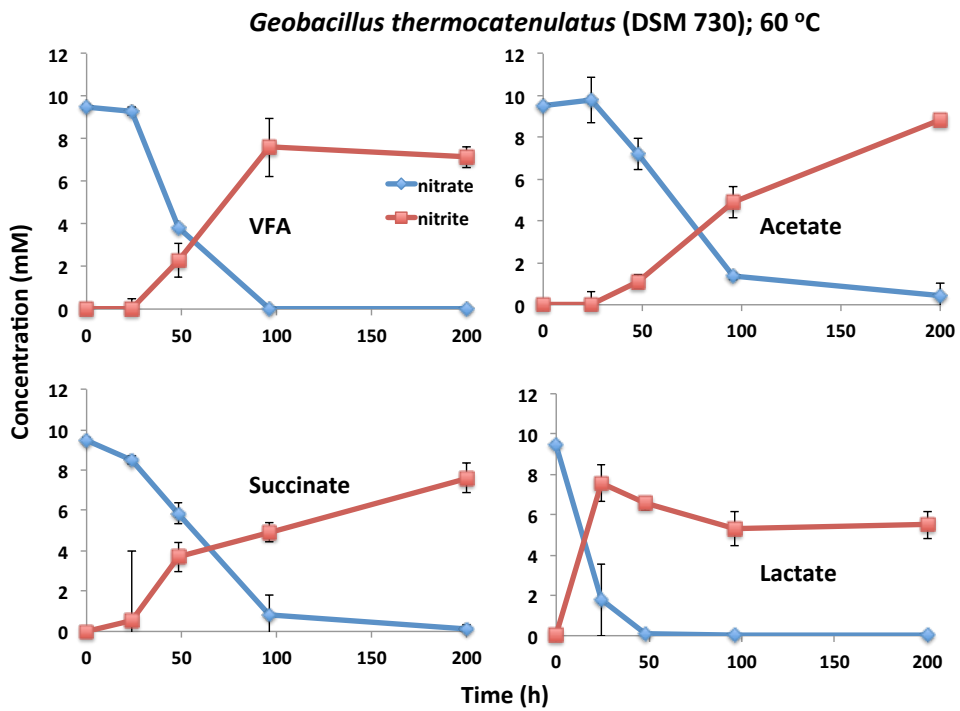

FIG. S6. (continued)

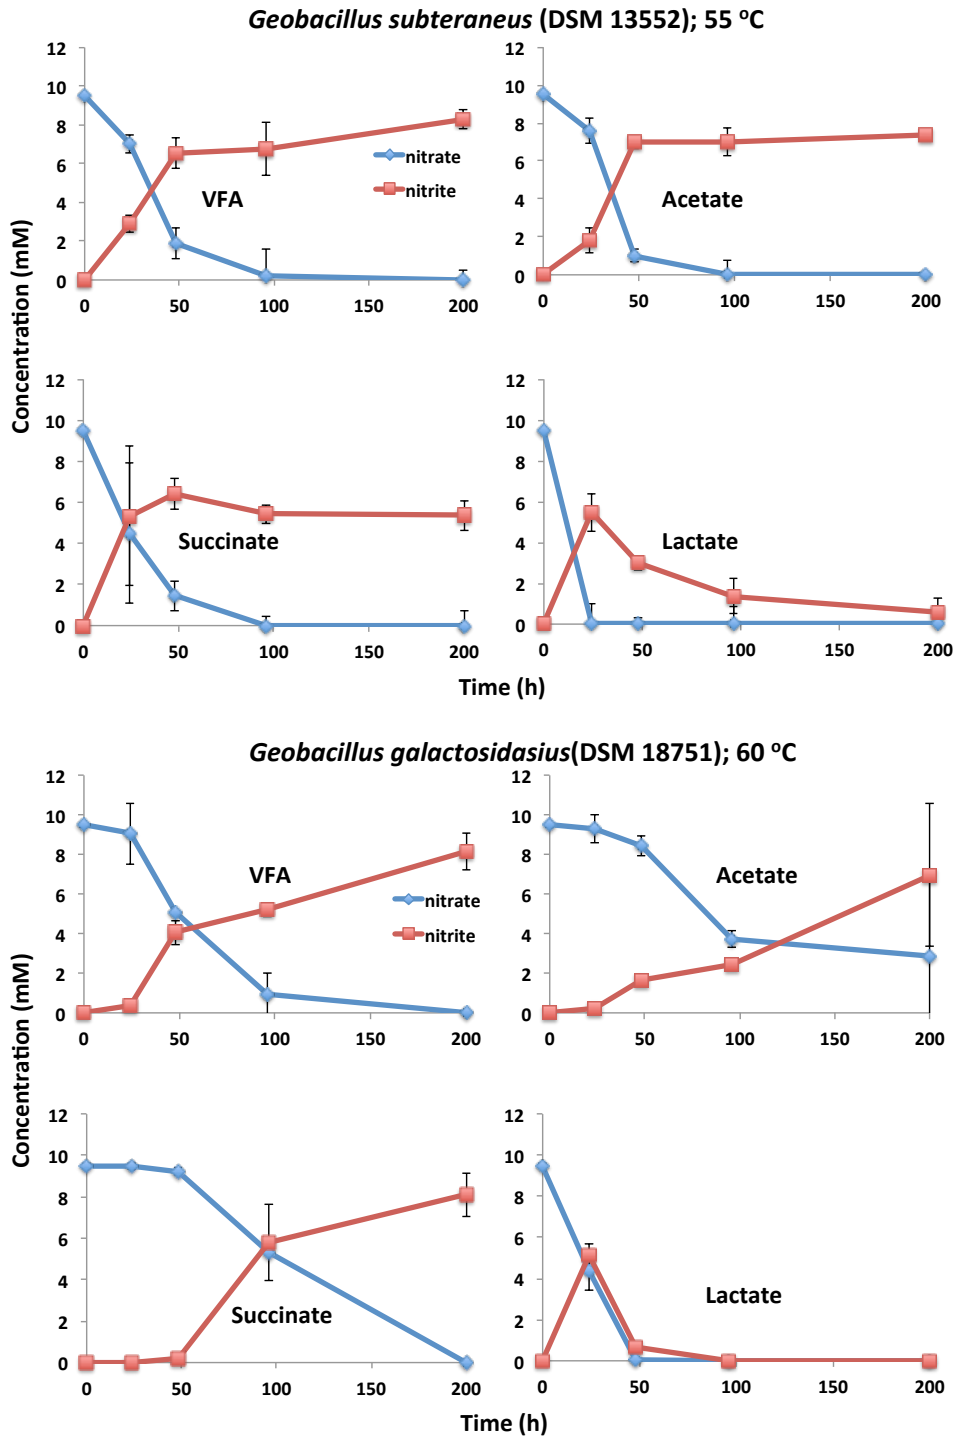

FIG. S6. (continued)

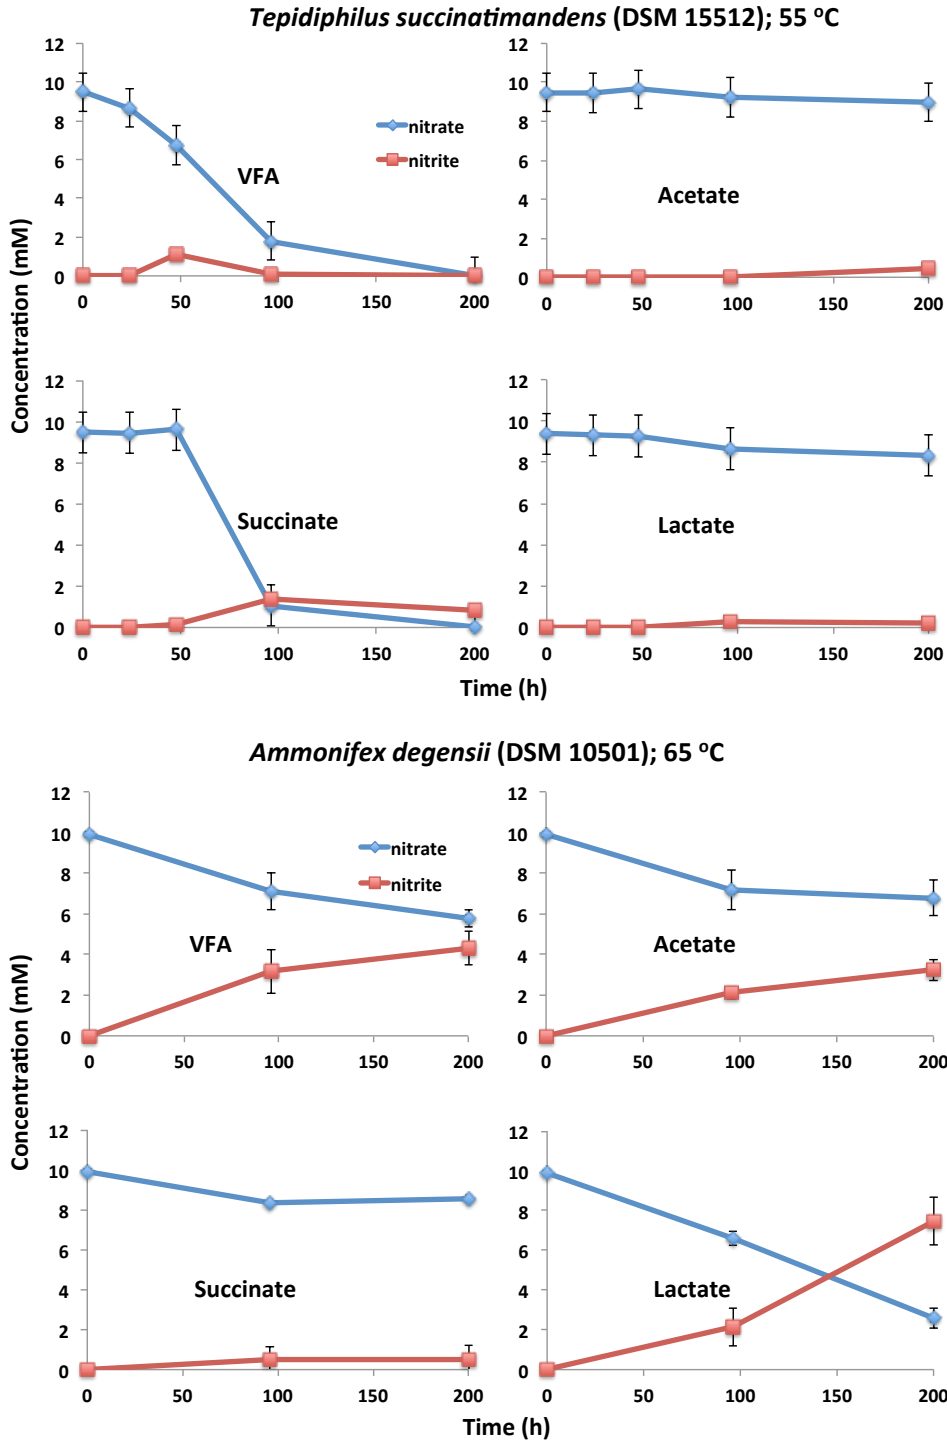

FIG. S6. (continued)

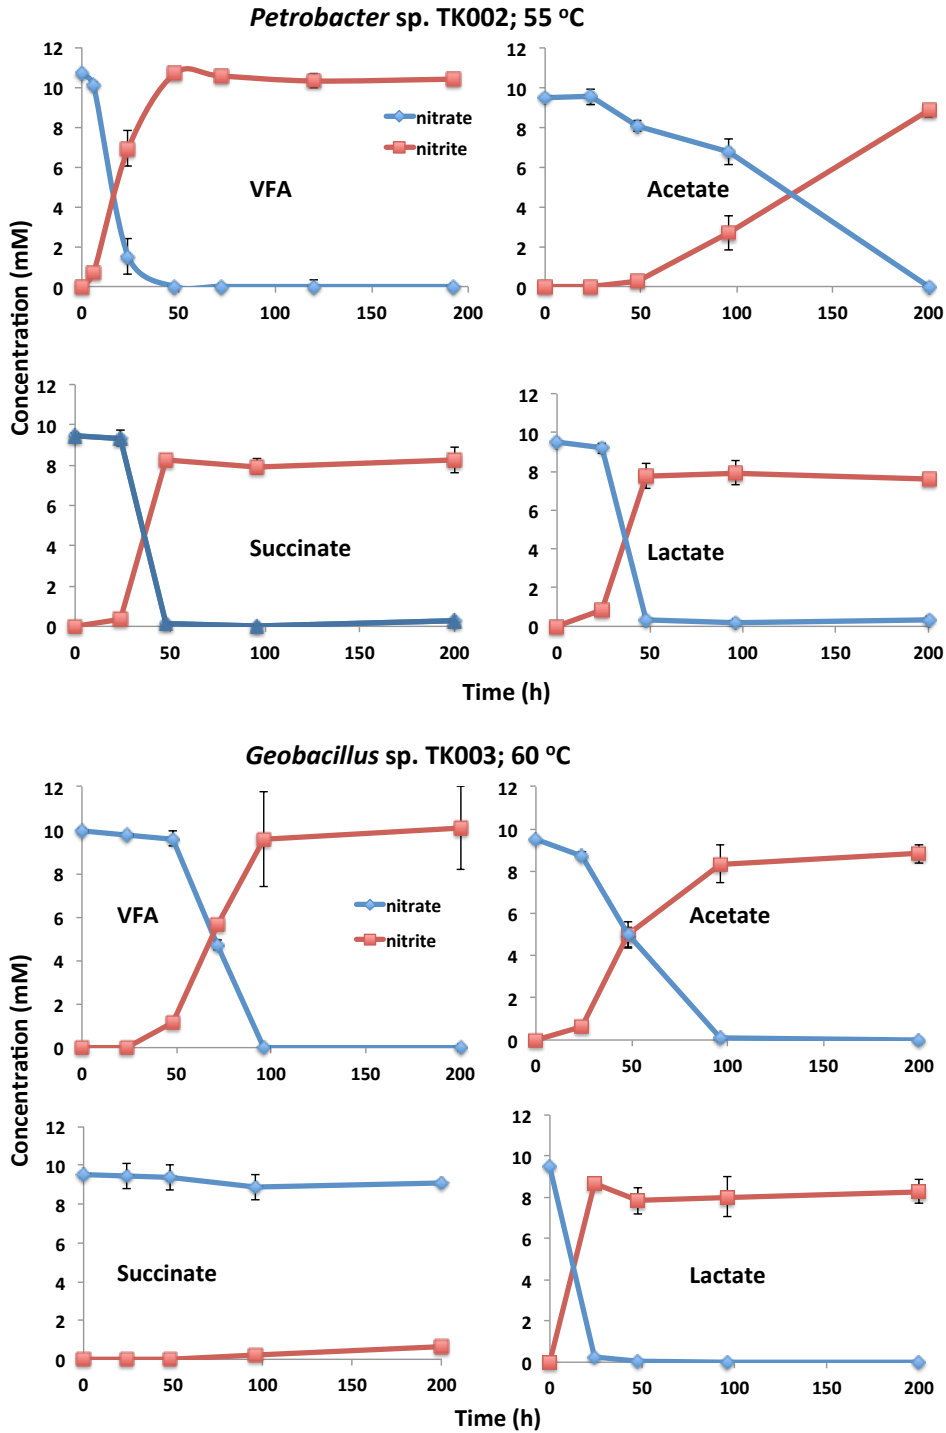

FIG. S6. Incubation of deposited tNRB cultures, obtained from the DSMZ, as well as of TK002 and TK003 in CSBK medium with nitrate and either VFA, acetate, succinate or lactate at the optimum growth temperature as indicated. Data shown are averages of duplicate incubations.
